# Supplementary material for: The expanding burden of idiopathic intracranial hypertension
Source: PubMed Central journal article supplement (PMC6460708; doi:10.1038/s41433-018-0238-5), 2018-10-24

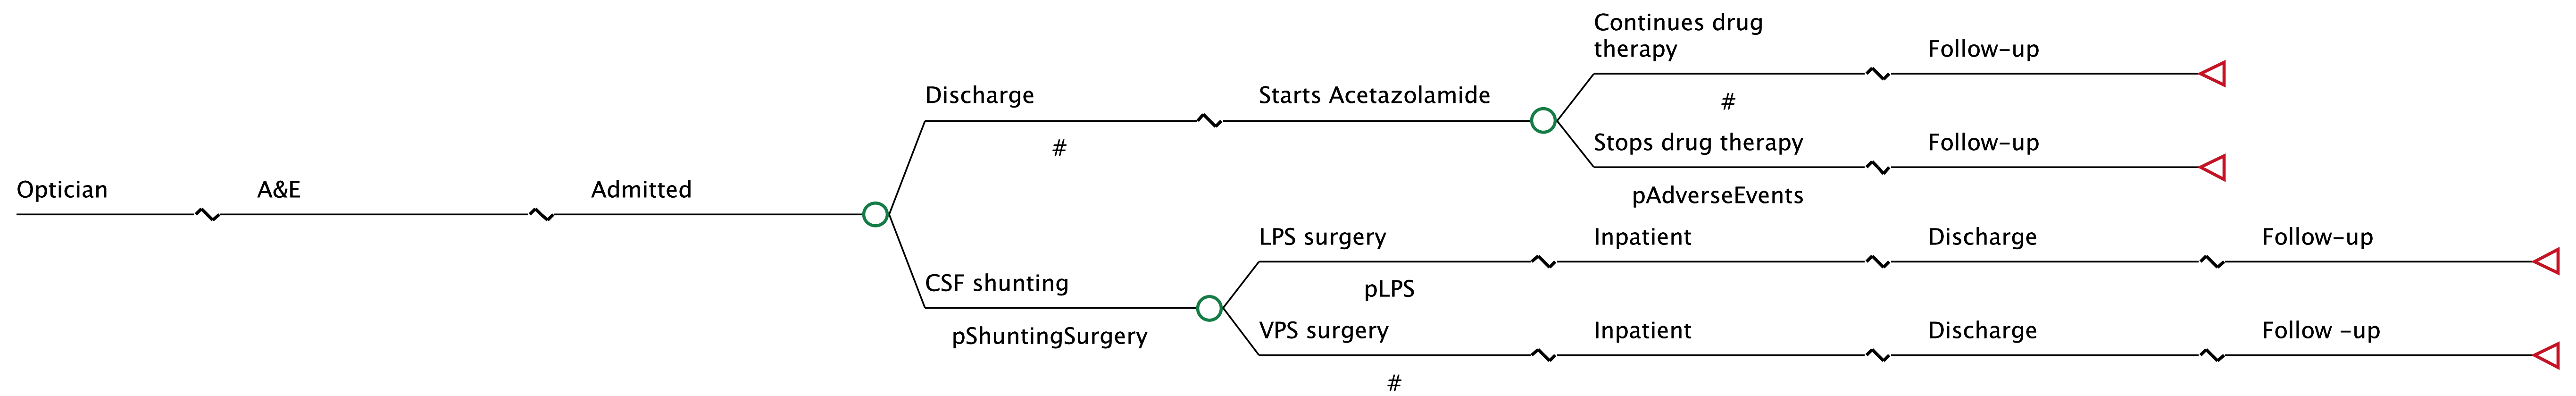

Supplement: 41433_2018_238_MOESM7_ESM.pdf [file 41433_2018_238_MOESM7_ESM.pdf]
